# Supplementary material for: Amorphous CoB layer cooperates with piezoelectric polarization to boost carrier separation of Bi2WO6 for efficient piezo-PEC performance
Source: Royal Society of Chemistry journal article supplement (doi:10.1039/d3se00721a), 2023-01-01
Supplement: d3se00721a1.pdf [file d3se00721a1.pdf]

## Supporting Information

Fig. S1 (a) Top-view SEM images of  $\text{Bi}_2\text{WO}_6$ , (b)  $\text{Bi}_2\text{WO}_6\text{-F}_{0.5}$ , (c)  $\text{Bi}_2\text{WO}_6\text{-F}_{1.0}$  and (d)  $\text{Bi}_2\text{WO}_6\text{-F}_{1.5}$

Fig. S2 (a), (b) TEM images of  $\text{Bi}_2\text{WO}_6/\text{CoB-2}$  sample

Fig. S3 The full spectrum diagram of (a)  $\text{Bi}_2\text{WO}_6$  and (b)  $\text{Bi}_2\text{WO}_6/\text{CoB-2}$

Fig. S4 The equivalent circuit model used to stimulate the Nyquist plots in Fig. 10 (a), (b) and Fig. S5

Fig. S5 (a) Electrochemical impedance spectroscopy (EIS) of  $\text{Bi}_2\text{WO}_6$ ,  $\text{Bi}_2\text{WO}_6/\text{CoB-1}$ ,  $\text{Bi}_2\text{WO}_6/\text{CoB-2}$  and  $\text{Bi}_2\text{WO}_6/\text{CoB-3}$  samples in dark and (b) under ultrasound condition

Fig. S6 (a) LSV curves of  $\text{Bi}_2\text{WO}_6$ ,  $\text{Bi}_2\text{WO}_6/\text{CoB-1}$ ,  $\text{Bi}_2\text{WO}_6/\text{CoB-2}$  and  $\text{Bi}_2\text{WO}_6/\text{CoB-3}$  measured in 0.5 M  $\text{Na}_2\text{SO}_4$  electrolyte solution with the addition of 0.25 M  $\text{Na}_2\text{SO}_3$  and (b) under ultrasound condition

Fig. S7 Stability of  $\text{Bi}_2\text{WO}_6$ ,  $\text{Bi}_2\text{WO}_6/\text{CoB-1}$ ,  $\text{Bi}_2\text{WO}_6/\text{CoB-2}$  and  $\text{Bi}_2\text{WO}_6/\text{CoB-3}$  in the light and ultrasound condition

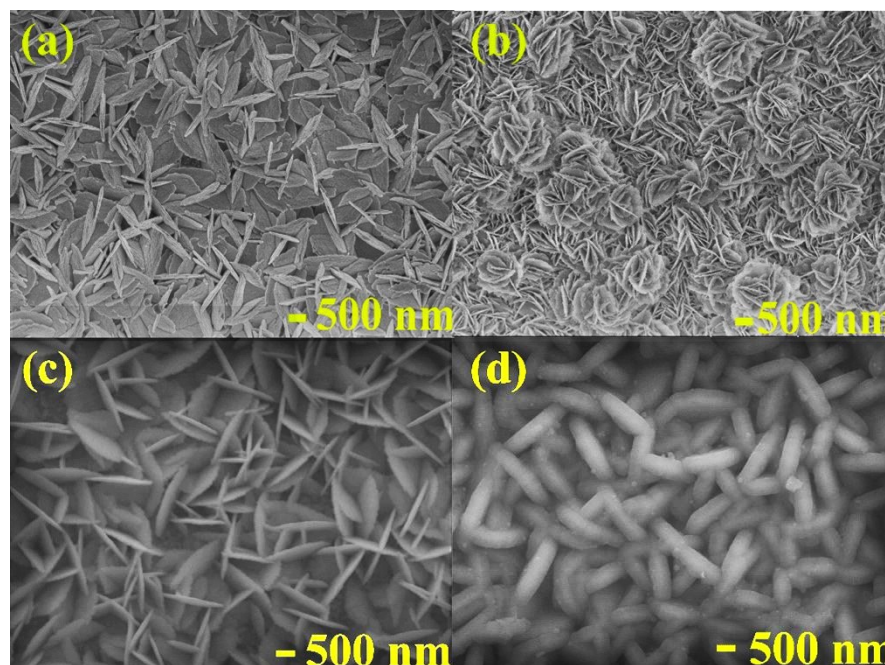

Fig. S1 (a) Top-view SEM images of  $\text{Bi}_2\text{WO}_6$ , (b)  $\text{Bi}_2\text{WO}_6\text{-F}_{0.5}$ , (c)  $\text{Bi}_2\text{WO}_6\text{-F}_{1.0}$  and (d)  $\text{Bi}_2\text{WO}_6\text{-F}_{1.5}$

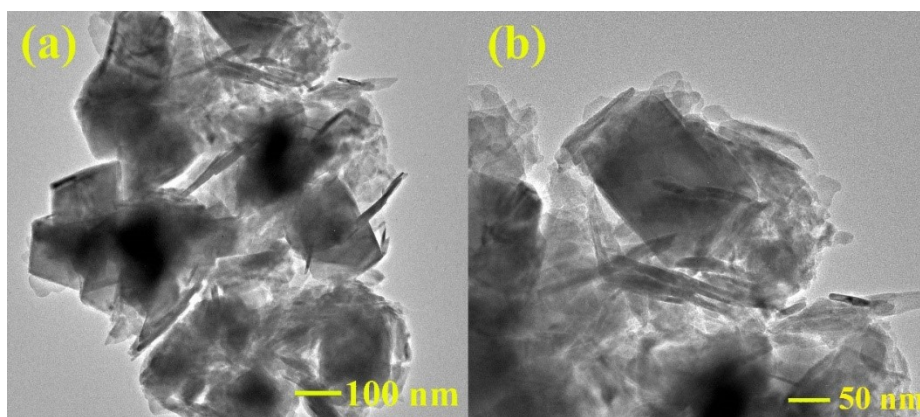

Fig. S2 (a), (b) TEM images of  $\text{Bi}_2\text{WO}_6/\text{CoB-2}$  sample

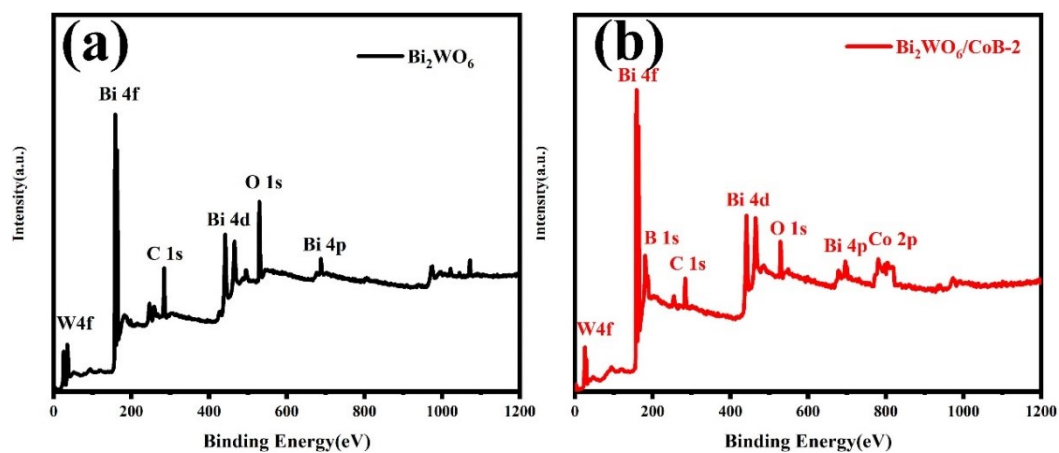

Fig. S3 The full spectrum diagram of (a)  $\text{Bi}_2\text{WO}_6$  and (b)  $\text{Bi}_2\text{WO}_6/\text{CoB-2}$

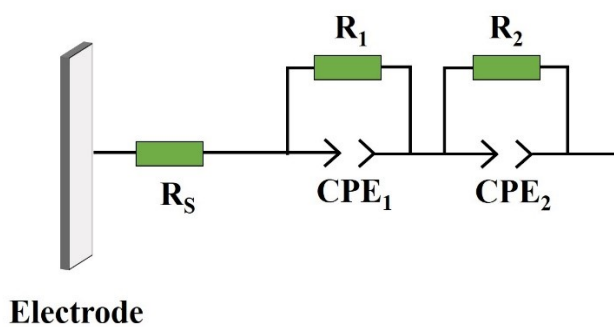

Fig. S4 The equivalent circuit model used to stimulate the Nyquist plots in Fig. 10 (a), (b) and Fig. S5

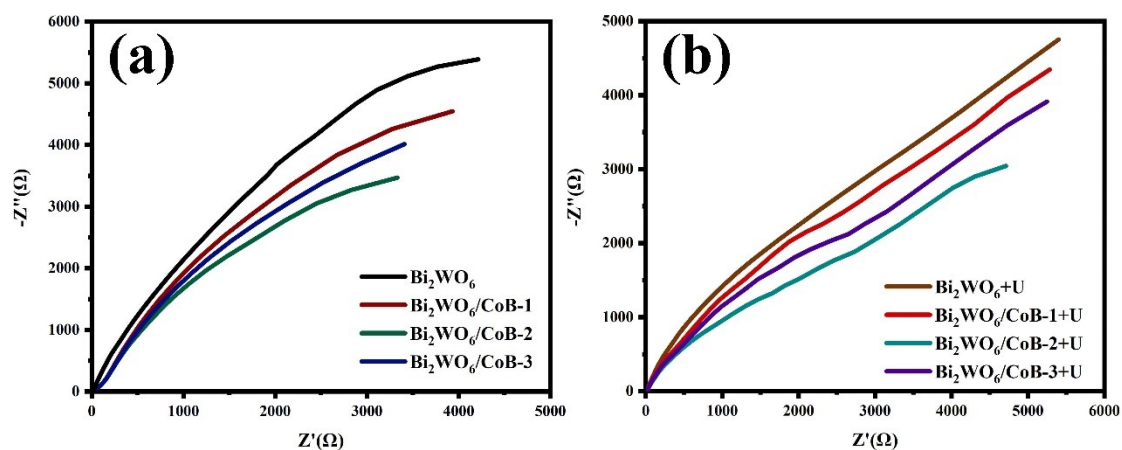

Fig. S5 (a) Electrochemical impedance spectroscopy (EIS) of  $\text{Bi}_2\text{WO}_6$ ,  $\text{Bi}_2\text{WO}_6/\text{CoB-1}$ ,  $\text{Bi}_2\text{WO}_6/\text{CoB-2}$  and  $\text{Bi}_2\text{WO}_6/\text{CoB-3}$  samples in dark and (b) under ultrasound condition

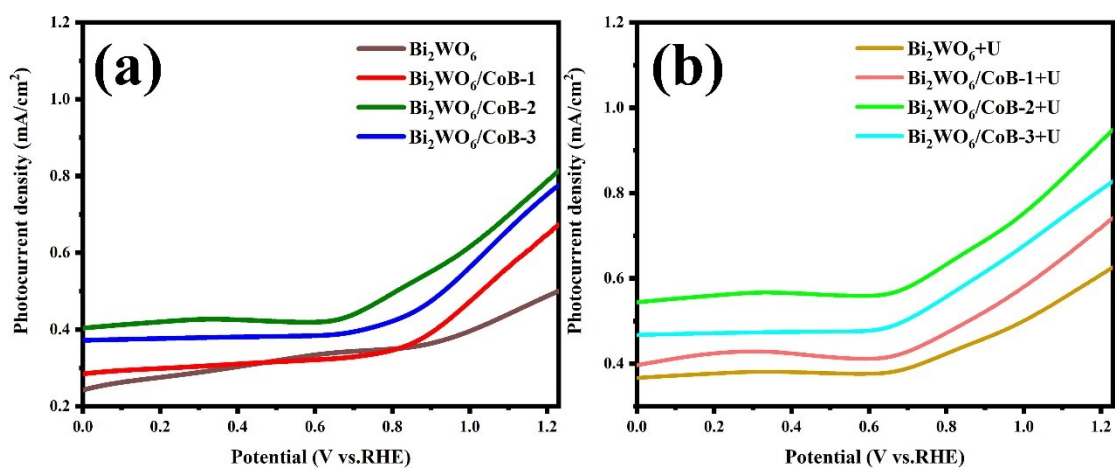

Fig. S6 (a) LSV curves of  $\text{Bi}_2\text{WO}_6$ ,  $\text{Bi}_2\text{WO}_6/\text{CoB-1}$ ,  $\text{Bi}_2\text{WO}_6/\text{CoB-2}$  and  $\text{Bi}_2\text{WO}_6/\text{CoB-3}$  measured in 0.5 M  $\text{Na}_2\text{SO}_4$  electrolyte solution with the addition of 0.25 M  $\text{Na}_2\text{SO}_3$  and (b) under ultrasound condition

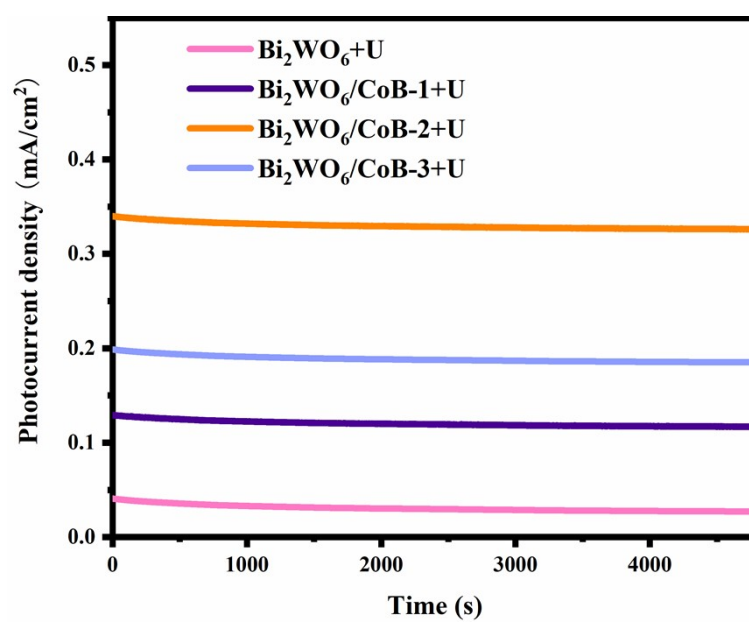

Fig. S7 Stability of Bi<sub>2</sub>WO<sub>6</sub>, Bi<sub>2</sub>WO<sub>6</sub>/CoB-1, Bi<sub>2</sub>WO<sub>6</sub>/CoB-2 and Bi<sub>2</sub>WO<sub>6</sub>/CoB-3 in the light and ultrasound condition
